# Supplementary material
Source: PubMed Central journal article supplement (PMC6195186)
Supplement: NIHMS80034-supplement-Supplemental_Digital_Contents.pdf [file NIHMS80034-supplement-Supplemental_Digital_Contents.pdf]

**Supplemental Digital Content 1. Metabolic data by activities for indirect calorimetry**

| Activity               | n  | kcal/min    | Min - Max   | L/min       | Min -       |     | ml/kg/min   | Min - Max    | METs        | Min - Max   |
|------------------------|----|-------------|-------------|-------------|-------------|-----|-------------|--------------|-------------|-------------|
|                        |    |             |             |             | Max         | Max |             |              |             |             |
| <i>REE</i>             |    |             |             |             |             |     |             |              |             |             |
| 5-12y                  | 56 | 1.19 ± 0.24 | 0.81 - 2.15 | 0.24 ± 0.05 | 0.17 - 0.42 |     | 7.89 ± 1.80 | 3.59 - 12.09 | -           | -           |
| 5-9y                   | 31 | 1.06 ± 0.13 | 0.81 - 1.31 | 0.22 ± 0.03 | 0.17 - 0.27 |     | 8.57 ± 1.71 | 5.78 - 12.09 | -           | -           |
| 10-12y                 | 25 | 1.35 ± 0.26 | 0.91 - 2.15 | 0.28 ± 0.05 | 0.19 - 0.42 |     | 7.05 ± 1.57 | 3.59 - 10.18 | -           | -           |
| <i>TV viewing</i>      |    |             |             |             |             |     |             |              |             |             |
| 5-12y                  | 56 | 1.24 ± 0.25 | 0.83 - 2.08 | 0.26 ± 0.05 | 0.17 - 0.43 |     | 8.29 ± 1.73 | 5.68 - 12.98 | 1.09 ± 0.16 | 0.84 - 1.81 |
| 5-9y                   | 31 | 1.12 ± 0.16 | 0.83 - 1.50 | 0.23 ± 0.03 | 0.17 - 0.31 |     | 9.10 ± 1.61 | 5.95 - 12.98 | 1.10 ± 0.14 | 0.84 - 1.56 |
| 10-12y                 | 25 | 1.39 ± 0.27 | 0.92 - 2.08 | 0.29 ± 0.06 | 0.19 - 0.43 |     | 7.28 ± 1.31 | 5.68 - 10.87 | 1.08 ± 0.18 | 0.90 - 1.81 |
| <i>Computer game</i>   |    |             |             |             |             |     |             |              |             |             |
| 5-12y                  | 56 | 1.28 ± 0.25 | 0.67 - 1.78 | 0.27 ± 0.05 | 0.14 - 0.38 |     | 8.55 ± 1.80 | 5.39 - 12.10 | 1.13 ± 0.18 | 0.75 - 1.83 |
| 5-9y                   | 31 | 1.17 ± 0.19 | 0.67 - 1.50 | 0.24 ± 0.04 | 0.14 - 0.31 |     | 9.50 ± 1.64 | 5.70 - 12.10 | 1.15 ± 0.17 | 0.75 - 1.54 |
| 10-12y                 | 25 | 1.41 ± 0.26 | 0.96 - 1.78 | 0.29 ± 0.06 | 0.19 - 0.38 |     | 7.38 ± 1.23 | 5.39 - 9.56  | 1.10 ± 0.20 | 0.75 - 1.83 |
| <i>Handheld e-game</i> |    |             |             |             |             |     |             |              |             |             |
| 5-12y                  | 55 | 1.36 ± 0.25 | 0.85 - 2.24 | 0.28 ± 0.05 | 0.18 - 0.46 |     | 9.12 ± 2.18 | 5.93 - 14.17 | 1.19 ± 0.18 | 0.93 - 1.90 |

|                          |    |             |             |             |             |              |               |             |             |
|--------------------------|----|-------------|-------------|-------------|-------------|--------------|---------------|-------------|-------------|
| 5-9y                     | 30 | 1.25 ± 0.17 | 0.85 - 1.70 | 0.26 ± 0.04 | 0.18 - 0.35 | 10.27 ± 2.10 | 5.99 - 14.17  | 1.22 ± 0.16 | 0.94 - 1.50 |
| 10-12y                   | 25 | 1.49 ± 0.28 | 0.94 - 2.24 | 0.31 ± 0.06 | 0.19 - 0.46 | 7.79 ± 1.37  | 5.93 - 11.07  | 1.16 ± 0.20 | 0.93 - 1.90 |
| <i>Writing/Coloring</i>  |    |             |             |             |             |              |               |             |             |
| 5-12y                    | 55 | 1.44 ± 0.28 | 0.91 - 2.18 | 0.30 ± 0.06 | 0.19 - 0.45 | 9.71 ± 2.25  | 5.41 - 15.99  | 1.27 ± 0.22 | 0.94 - 2.26 |
| 5-9y                     | 30 | 1.33 ± 0.20 | 0.91 - 1.82 | 0.28 ± 0.04 | 0.19 - 0.38 | 10.86 ± 2.11 | 7.12 - 15.99  | 1.30 ± 0.17 | 1.01 - 1.78 |
| 10-12y                   | 25 | 1.58 ± 0.30 | 1.08 - 2.18 | 0.33 ± 0.06 | 0.22 - 0.45 | 8.28 ± 1.47  | 5.41 - 12.07  | 1.24 ± 0.26 | 0.94 - 2.26 |
| <i>Standing activity</i> |    |             |             |             |             |              |               |             |             |
| 5-12y                    | 56 | 1.70 ± 0.34 | 1.15 - 2.77 | 0.35 ± 0.07 | 0.24 - 0.57 | 11.34 ± 2.25 | 7.66 - 16.45  | 1.50 ± 0.23 | 1.11 - 2.58 |
| 5-9y                     | 31 | 1.53 ± 0.24 | 1.15 - 2.06 | 0.32 ± 0.05 | 0.24 - 0.43 | 12.41 ± 2.07 | 8.85 - 16.45  | 1.50 ± 0.19 | 1.20 - 1.85 |
| 10-12y                   | 25 | 1.90 ± 0.34 | 1.32 - 2.77 | 0.40 ± 0.07 | 0.28 - 0.57 | 10.02 ± 1.71 | 7.66 - 13.03  | 1.49 ± 0.27 | 1.11 - 2.58 |
| <i>Getting ready</i>     |    |             |             |             |             |              |               |             |             |
| 5-12y                    | 56 | 2.81 ± 0.63 | 1.64 - 4.32 | 0.59 ± 0.13 | 0.33 - 0.92 | 18.64 ± 3.07 | 13.06 - 24.90 | 2.49 ± 0.45 | 1.67 - 4.01 |
| 5-9y                     | 31 | 2.52 ± 0.48 | 1.64 - 3.42 | 0.53 ± 0.10 | 0.33 - 0.71 | 20.17 ± 2.04 | 15.09 - 24.35 | 2.48 ± 0.44 | 1.67 - 3.23 |
| 10-12y                   | 25 | 3.18 ± 0.59 | 1.98 - 4.32 | 0.66 ± 0.13 | 0.42 - 0.92 | 16.75 ± 3.11 | 13.06 - 24.90 | 2.50 ± 0.48 | 1.73 - 4.01 |
| <i>Slow Walk</i>         |    |             |             |             |             |              |               |             |             |
| 5-12y                    | 56 | 3.26 ± 0.66 | 2.28 - 4.93 | 0.68 ± 0.14 | 0.46 - 1.04 | 21.80 ± 3.86 | 15.05 - 33.44 | 2.90 ± 0.50 | 1.92 - 4.45 |
| 5-9y                     | 31 | 2.97 ± 0.47 | 2.28 - 4.61 | 0.62 ± 0.10 | 0.46 - 0.97 | 24.04 ± 3.24 | 16.40 - 33.44 | 2.92 ± 0.42 | 2.31 - 3.95 |
| 10-12y                   | 25 | 3.62 ± 0.70 | 2.43 - 4.93 | 0.76 ± 0.15 | 0.51 - 1.04 | 19.02 ± 2.55 | 15.05 - 25.17 | 2.87 ± 0.60 | 1.92 - 4.45 |

|                         |    |             |              |             |             |              |               |             |              |
|-------------------------|----|-------------|--------------|-------------|-------------|--------------|---------------|-------------|--------------|
| <i>Dancing</i>          |    |             |              |             |             |              |               |             |              |
| 5-12y                   | 55 | 3.53 ± 1.22 | 1.85 - 6.78  | 0.73 ± 0.25 | 0.39 - 1.39 | 22.77 ± 3.85 | 15.22 - 32.12 | 3.09 ± 0.85 | 1.70 - 5.26  |
| 5-9y                    | 31 | 2.98 ± 0.93 | 1.85 - 5.78  | 0.62 ± 0.19 | 0.39 - 1.22 | 23.45 ± 3.94 | 15.22 - 31.45 | 2.91 ± 0.82 | 1.70 - 5.15  |
| 10-12y                  | 24 | 4.24 ± 1.21 | 2.43 - 6.78  | 0.88 ± 0.25 | 0.50 - 1.39 | 21.90 ± 3.62 | 16.27 - 32.12 | 3.32 ± 0.86 | 2.12 - 5.26  |
| <i>Brisk Walk</i>       |    |             |              |             |             |              |               |             |              |
| 5-12y                   | 56 | 3.88 ± 0.95 | 2.51 - 6.45  | 0.80 ± 0.19 | 0.51 - 1.30 | 25.34 ± 4.05 | 17.62 - 37.96 | 3.38 ± 0.63 | 2.26 - 5.83  |
| 5-9y                    | 31 | 3.41 ± 0.61 | 2.51 - 5.12  | 0.70 ± 0.12 | 0.51 - 1.05 | 27.13 ± 3.66 | 21.12 - 37.96 | 3.29 ± 0.44 | 2.63 - 4.42  |
| 10-12y                  | 25 | 4.47 ± 0.99 | 2.99 - 6.45  | 0.92 ± 0.20 | 0.63 - 1.30 | 23.12 ± 3.41 | 17.62 - 29.10 | 3.49 ± 0.81 | 2.26 - 5.83  |
| <i>Tidy up</i>          |    |             |              |             |             |              |               |             |              |
| 5-12y                   | 55 | 4.07 ± 1.16 | 2.21 - 7.05  | 0.85 ± 0.24 | 0.45 - 1.49 | 26.31 ± 3.84 | 19.72 - 36.75 | 3.57 ± 0.84 | 2.14 - 7.42  |
| 5-9y                    | 30 | 3.52 ± 0.85 | 2.21 - 6.01  | 0.73 ± 0.18 | 0.45 - 1.26 | 27.72 ± 3.84 | 20.73 - 36.75 | 3.42 ± 0.65 | 2.14 - 4.71  |
| 10-12y                  | 25 | 4.74 ± 1.15 | 2.73 - 7.05  | 0.99 ± 0.24 | 0.58 - 1.49 | 24.63 ± 3.16 | 19.72 - 30.61 | 3.75 ± 1.02 | 2.79 - 7.42  |
| <i>Running</i>          |    |             |              |             |             |              |               |             |              |
| 5-12y                   | 56 | 6.66 ± 2.12 | 2.76 - 11.61 | 1.36 ± 0.44 | 0.57 - 2.46 | 42.18 ± 6.99 | 21.05 - 59.34 | 5.68 ± 1.34 | 2.85 - 10.41 |
| 5-9y                    | 31 | 5.28 ± 1.21 | 2.76 - 7.18  | 1.08 ± 0.25 | 0.57 - 1.46 | 41.59 ± 8.07 | 21.05 - 59.34 | 5.05 ± 1.01 | 2.85 - 6.96  |
| 10-12y                  | 25 | 8.37 ± 1.73 | 5.18 - 11.61 | 1.72 ± 0.36 | 1.06 - 2.46 | 42.92 ± 5.43 | 33.05 - 52.75 | 6.47 ± 1.30 | 4.09 - 10.41 |
| <i>Locomotor course</i> |    |             |              |             |             |              |               |             |              |
| 5-12y                   | 54 | 7.14 ± 2.28 | 2.68 - 12.17 | 1.47 ± 0.47 | 0.56 - 2.54 | 45.16 ± 7.63 | 10.08 - 62.81 | 6.05 ± 1.20 | 2.81 - 8.22  |

|                   |    |             |              |             |             |              |               |             |              |
|-------------------|----|-------------|--------------|-------------|-------------|--------------|---------------|-------------|--------------|
| 5-9y              | 29 | 5.87 ± 1.34 | 3.88 - 9.62  | 1.20 ± 0.27 | 0.78 - 1.94 | 45.43 ± 5.68 | 37.06 - 60.59 | 5.58 ± 0.91 | 3.82 - 7.26  |
| 10-12y            | 25 | 8.62 ± 2.26 | 2.68 - 12.17 | 1.78 ± 0.47 | 0.56 - 2.54 | 44.85 ± 9.52 | 10.08 - 62.81 | 6.59 ± 1.28 | 2.81 - 8.22  |
| <i>Soccer</i>     |    |             |              |             |             |              |               |             |              |
| 5-12y             | 55 | 7.21 ± 2.08 | 3.53 - 12.76 | 1.47 ± 0.44 | 0.73 - 2.73 | 46.23 ± 7.06 | 35.19 - 70.82 | 6.22 ± 1.42 | 3.48 - 12.28 |
| 5-9y              | 31 | 6.05 ± 1.41 | 3.53 - 10.13 | 1.23 ± 0.29 | 0.73 - 2.04 | 47.03 ± 6.27 | 36.63 - 64.26 | 5.78 ± 1.18 | 3.48 - 7.67  |
| 10-12y            | 24 | 8.70 ± 1.87 | 5.99 - 12.76 | 1.79 ± 0.40 | 1.20 - 2.73 | 45.19 ± 7.99 | 35.19 - 70.82 | 6.77 ± 1.53 | 4.29 - 12.28 |
| <i>Basketball</i> |    |             |              |             |             |              |               |             |              |
| 5-12y             | 54 | 6.64 ± 2.15 | 3.27 - 11.65 | 1.36 ± 0.44 | 0.66 - 2.33 | 41.44 ± 5.99 | 28.83 - 54.42 | 5.65 ± 1.41 | 2.97 - 11.44 |
| 5-9y              | 29 | 5.29 ± 1.36 | 3.27 - 7.90  | 1.08 ± 0.27 | 0.66 - 1.59 | 40.89 ± 6.10 | 28.83 - 54.42 | 5.06 ± 1.15 | 2.97 - 7.04  |
| 10-12y            | 25 | 8.19 ± 1.81 | 5.24 - 11.65 | 1.69 ± 0.37 | 1.10 - 2.33 | 42.07 ± 5.93 | 30.68 - 52.00 | 6.33 ± 1.39 | 4.27 - 11.44 |

Notes: Mean volume of oxygen consumption and carbon dioxide production were converted into units of energy expenditure

(kcal/min) using the Weir equation (42). METs, metabolic equivalents; REE, resting energy expenditure.

**Supplemental Digital Content 2.** Supplementary analyses for the raw wrist acceleration cut-points using a  $\geq 4$ -MET MVPA definition.

Supplemental Digital Content 2.1: Contingency tables for classification accuracy of raw wrist acceleration cut-points using a  $\geq 4$ -MET MVPA definition

| Actual Intensity      | Cut-points classification of intensity |                    |                    |
|-----------------------|----------------------------------------|--------------------|--------------------|
|                       | 1                                      | 2                  | 3                  |
| ENMO <sub>192+</sub>  |                                        |                    |                    |
| 1. non-MVPA           | <b>14032 (93.1)</b>                    | 904 (6.0)          | 137 (0.9)          |
| 2. MPA                | 2181 (46.0)                            | <b>2213 (46.6)</b> | 352 (7.4)          |
| 3. VPA                | 560 (9.9)                              | 2039 (36.2)        | <b>3034 (53.9)</b> |
| GENEA <sub>250+</sub> |                                        |                    |                    |
| 1. non-MVPA           | <b>13887 (92.1)</b>                    | 1035 (6.9)         | 161 (1.1)          |
| 2. MPA                | 1936 (40.8)                            | <b>2363 (49.8)</b> | 447 (9.4)          |
| 3. VPA                | 217 (3.9)                              | 1707 (30.3)        | <b>3709 (65.8)</b> |
| BFEN <sub>314+</sub>  |                                        |                    |                    |
| 1. non-MVPA           | <b>12322 (81.7)</b>                    | 2493 (16.5)        | 258 (1.7)          |
| 2. MPA                | 672 (14.2)                             | <b>3421 (72.1)</b> | 653 (13.8)         |
| 3. VPA                | 42 (0.7)                               | 918 (16.3)         | <b>4673 (83.0)</b> |

The presented values indicate the proportion of epochs classified for each intensity, with percentages presented between brackets. The values in boldface indicate the proportion of epochs correctly classified for the physical activity intensity. MPA: moderate physical activity; VPA: vigorous physical activity; MVPA: moderate-to-vigorous physical activity; ENMO: cut-points developed using Euclidian norm minus one; GENEActiv: cut-points developed using the GENEActiv post processing software; BFEN: cut-points developed using Bandpass Filtered followed by Euclidian Norm.

Supplemental Digital Content 2.2: Agreement analysis of raw wrist acceleration-based estimations of physical activity intensities compared to indirect calorimetry using a  $\geq 4$ -MET MVPA definition.

| <b>Intensity</b>            | <b>Mean bias (%)</b> | <b>Limits of agreement</b> | <b>p-value slope</b> |
|-----------------------------|----------------------|----------------------------|----------------------|
| <b>ENMO<sub>192+</sub></b>  |                      |                            |                      |
| <i>MPA</i>                  | -2.6                 | -78.7 - 73.6               | 0.00                 |
| <i>VPA</i>                  | 53.7                 | -44.6 - 152.1              | 0.00                 |
| <i>MVPA</i>                 | 12.6                 | -18.3 - 43.5               | 0.85                 |
| <b>GENEA<sub>250+</sub></b> |                      |                            |                      |
| <i>MPA</i>                  | -1.5                 | -80.0 - 76.9%              | 0.01                 |
| <i>VPA</i>                  | 28.6                 | -39.4 - 96.6               | 0.00                 |
| <i>MVPA</i>                 | 9.3                  | -23.0 - 41.6               | 0.03                 |
| <b>BFEN<sub>314+</sub></b>  |                      |                            |                      |
| <i>MPA</i>                  | -34.4                | -89.1 - 20.4               | 0.01                 |
| <i>VPA</i>                  | -0.5*                | -40.6 - 39.7               | 0.04                 |
| <i>MVPA</i>                 | -18.3                | -50.2 - 13.5               | 0.11                 |

*MPA*: moderate physical activity; *VPA*: vigorous physical activity; *MVPA*: moderate-to-vigorous physical activity; ENMO: cut-points developed using Euclidian norm minus one; GENE: cut-points developed using the GENEActiv post processing software; BFEN: cut-points developed using Bandpass Filtered followed by Euclidian Norm. Mean bias was calculated as: measured intensity time – estimated intensity time; a positive value indicates underestimation; a negative value indicates overestimation. \*Significantly equivalent to indirect calorimetry ( $p < 0.05$ ).

Supplemental Digital Content 2.3: 95% equivalence test for raw wrist acceleration-based estimated time spent in physical activity intensities using a  $\geq 4$ -MET MVPA definition.

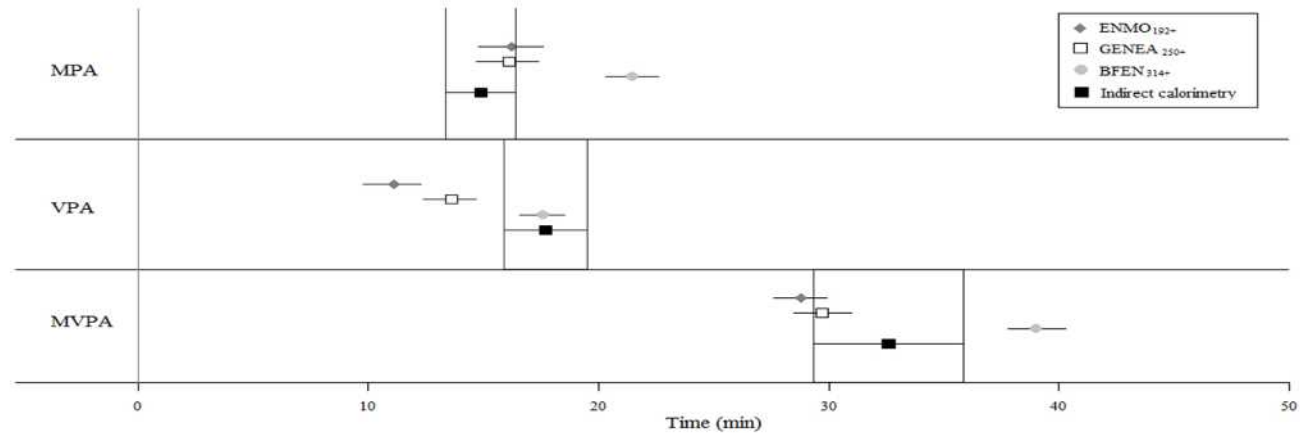

Times estimated by wrist-worn cut-points are equivalent to indirect calorimetry if 90% confidence intervals lie entirely within the equivalence region of indirect calorimetry. MPA: moderate physical activity; VPA: vigorous physical activity; MVPA: moderate-to-vigorous physical activity; ENMO: cut-points developed using Euclidian norm minus one; GENE: cut-points developed using the GENEActiv post processing software; BFEN: cut-points developed using Bandpass Filtered followed by Euclidian Norm.

Supplemental Digital Content 2.4: Confusion matrices for the raw wrist acceleration cut-points using a  $\geq 4$ -MET MVPA definition.

Table 1. Confusion matrix for sedentary and light physical activity intensity activities.

| Actual Intensity | Lying Down                  |            |   | TV viewing   |     |   | Computer Game |     |   | Handheld e-game |            |   | Writing/ Colouring |     |   | Standing activity |            |   | Getting ready |            |     | Slow walk   |             |            |
|------------------|-----------------------------|------------|---|--------------|-----|---|---------------|-----|---|-----------------|------------|---|--------------------|-----|---|-------------------|------------|---|---------------|------------|-----|-------------|-------------|------------|
|                  | 1                           | 2          | 3 | 1            | 2   | 3 | 1             | 2   | 3 | 1               | 2          | 3 | 1                  | 2   | 3 | 1                 | 2          | 3 | 1             | 2          | 3   | 1           | 2           | 3          |
|                  | <b>ENMO<sub>192+</sub></b>  |            |   |              |     |   |               |     |   |                 |            |   |                    |     |   |                   |            |   |               |            |     |             |             |            |
| 1. non-MVPA      | <b>100.0</b>                | 0.0        | - | <b>100.0</b> | 0.0 | - | <b>99.9</b>   | 0.1 | - | <b>100.0</b>    | 0.0        | - | <b>99.9</b>        | 0.1 | - | <b>99.1</b>       | 0.9        | - | <b>97.3</b>   | 2.0        | 0.8 | <b>80.9</b> | 18.5        | 0.6        |
| 2. MPA           | 100.0                       | <b>0.0</b> | - | -            | -   | - | -             | -   | - | 100.0           | <b>0.0</b> | - | -                  | -   | - | 100.0             | <b>0.0</b> | - | 92.3          | <b>7.4</b> | 0.3 | 55.5        | <b>44.5</b> | 0.0        |
| 3. VPA           | -                           | -          | - | -            | -   | - | -             | -   | - | -               | -          | - | -                  | -   | - | -                 | -          | - | -             | -          | -   | 25.0        | 75.0        | <b>0.0</b> |
| 4. MVPA          |                             | <b>0.0</b> |   |              | -   |   |               | -   |   |                 | <b>0.0</b> |   |                    | -   |   |                   | <b>0.0</b> |   |               | <b>7.7</b> |     |             | <b>44.7</b> |            |
|                  | <b>GENEA<sub>250+</sub></b> |            |   |              |     |   |               |     |   |                 |            |   |                    |     |   |                   |            |   |               |            |     |             |             |            |
| 1. non-MVPA      | <b>100.0</b>                | 0.0        | - | <b>100.0</b> | -   | - | <b>100.0</b>  | 0.0 | - | <b>100.0</b>    | 0.0        | - | <b>99.4</b>        | 0.6 | - | <b>98.8</b>       | 1.2        | - | <b>96.8</b>   | 2.4        | 0.8 | <b>69.8</b> | 29.5        | 0.7        |
| 2. MPA           | 100.0                       | <b>0.0</b> | - | -            | -   | - | -             | -   | - | 100.0           | <b>0.0</b> | - | -                  | -   | - | 100.0             | <b>0.0</b> | - | 91.4          | <b>8.3</b> | 0.3 | 47.0        | <b>53.0</b> | 0.0        |



|             |                            |            |   |             |    |   |             |            |   |             |           |             |            |             |   |             |            |   |            |            |     |            |            |            |
|-------------|----------------------------|------------|---|-------------|----|---|-------------|------------|---|-------------|-----------|-------------|------------|-------------|---|-------------|------------|---|------------|------------|-----|------------|------------|------------|
| 3. VPA      | -                          | -          | - | -           | -  | - | -           | -          | - | -           | -         | -           | -          | -           | - | -           | -          | - | -          | -          | 25. | 75.        | <b>0.0</b> |            |
|             |                            |            |   |             |    |   |             |            |   |             |           |             |            |             |   |             |            |   |            |            | 0   | 0          |            |            |
| 4. MVPA     |                            | <b>0.0</b> |   | -           |    | - |             | <b>0.0</b> |   | -           |           | <b>16.7</b> |            | <b>12.3</b> |   | <b>48.5</b> |            |   |            |            |     |            |            |            |
|             | <b>BFEN<sub>314+</sub></b> |            |   |             |    |   |             |            |   |             |           |             |            |             |   |             |            |   |            |            |     |            |            |            |
| 1. non-MVPA | <b>99.8</b>                | 0.         | - | <b>100.</b> | 0. | - | <b>98.7</b> | 1.         | - | <b>99.9</b> | 0.        | -           | <b>98.</b> | 1.          | - | <b>87.3</b> | 12.        | - | <b>33.</b> | 66.        | 0.  | <b>63.</b> | 35.        | 1.1        |
|             |                            | 2          |   | <b>0</b>    | 1  |   |             | 3          |   |             | 1         |             | <b>4</b>   | 6           |   |             | 7          |   | <b>3</b>   | 0          | 8   | <b>7</b>   | 3          |            |
| 2. MPA      | 100.                       | <b>0.</b>  | - | -           | -  | - | -           | -          | - | 100.        | <b>0.</b> | -           | -          | -           | - | 100.        | <b>0.0</b> | - | 18.        | <b>80.</b> | 0.  | 38.        | <b>61.</b> | 0.1        |
|             | 0                          | <b>0</b>   |   |             |    |   |             |            |   | 0           | <b>0</b>  |             |            |             | 0 |             |            | 5 | <b>9</b>   | 6          | 5   | <b>4</b>   |            |            |
| 3. VPA      | -                          | -          | - | -           | -  | - | -           | -          | - | -           | -         | -           | -          | -           | - | -           | -          | - | -          | -          | -   | 25.        | 25.        | <b>50.</b> |
|             |                            |            |   |             |    |   |             |            |   |             |           |             |            |             |   |             |            |   |            |            | 0   | 0          | <b>0</b>   |            |
| 4. MVPA     |                            | <b>0.0</b> |   | -           |    | - |             | <b>0.0</b> |   | -           |           | <b>0.0</b>  |            | <b>81.5</b> |   | <b>61.6</b> |            |   |            |            |     |            |            |            |

Note Table 1: Values in boldface indicate the percentage of epochs correctly classified. MPA: moderate physical activity; VPA: vigorous physical activity; MVPA: moderate-to-vigorous physical activity; ENMO: cut-points developed using Euclidian norm minus one; GENE: cut-points developed using the GENEActiv post processing software; BFEN: cut-points developed using Bandpass Filtered followed by Euclidian Norm.

Table 2. Confusion matrix for moderate physical activity intensity activities.

| Actual Intensity | Dancing                     |             |             | Brisk walk  |             |            | Tidy up     |             |            |
|------------------|-----------------------------|-------------|-------------|-------------|-------------|------------|-------------|-------------|------------|
|                  | 1                           | 2           | 3           | 1           | 2           | 3          | 1           | 2           | 3          |
|                  | <b>ENMO<sub>192+</sub></b>  |             |             |             |             |            |             |             |            |
| 1. non-MVPA      | <b>40.6</b>                 | 54.2        | 5.2         | <b>48.4</b> | 51.6        | 0.0        | <b>91.6</b> | 8.4         | 0.0        |
| 2. MPA           | 19.2                        | <b>61.8</b> | 19.1        | 23.2        | <b>76.4</b> | 0.4        | 85.8        | <b>14.2</b> | 0.0        |
| 3. VPA           | 12.0                        | 56.4        | <b>31.6</b> | 3.4         | 96.6        | <b>0.0</b> | 64.2        | 35.8        | <b>0.0</b> |
| 4. MVPA          |                             | <b>87.5</b> |             |             | <b>79.6</b> |            |             | <b>17.7</b> |            |
|                  | <b>GENEA<sub>250+</sub></b> |             |             |             |             |            |             |             |            |
| 1. non-MVPA      | <b>38.2</b>                 | 55.0        | 6.8         | <b>43.2</b> | 56.8        | <b>0.0</b> | <b>86.1</b> | 13.9        | 0.0        |
| 2. MPA           | 12.1                        | <b>61.2</b> | 26.7        | 20.3        | <b>78.9</b> | 0.8        | 79.6        | <b>20.4</b> | 0.0        |
| 3. VPA           | 3.4                         | 46.2        | <b>50.4</b> | 8.6         | 90.5        | <b>0.9</b> | 59.7        | 40.3        | <b>0.0</b> |
| 4. MVPA          |                             | <b>89.9</b> |             |             | <b>78.2</b> |            |             | <b>28.4</b> |            |
|                  | <b>BFEN<sub>314+</sub></b>  |             |             |             |             |            |             |             |            |
| 1. non-MVPA      | <b>14.3</b>                 | 70.8        | 14.9        | <b>34.4</b> | 65.6        | 0.0        | <b>28.6</b> | 71.4        | 0.0        |
| 2. MPA           | 0.7                         | <b>59.0</b> | 40.3        | 14.2        | <b>84.8</b> | 1.0        | 6.6         | <b>93.4</b> | 0.0        |
| 3. VPA           | 0.0                         | 35.9        | <b>64.1</b> | 0.9         | 90.5        | <b>8.6</b> | 6.5         | 93.5        | <b>0.0</b> |
| 4. MVPA          |                             | <b>99.4</b> |             |             | <b>86.9</b> |            |             | <b>93.4</b> |            |

Note Table 2: Values in boldface indicate the percentage of epochs correctly classified. MPA: moderate physical activity; VPA: vigorous physical activity; MVPA: moderate-to-vigorous physical activity; ENMO: cut-points developed using Euclidian norm minus one; GENE: cut-points developed using the GENEActiv post processing software; BFEN: cut-points developed using Bandpass Filtered followed by Euclidian Norm.

Table 3: Confusion matrix for vigorous physical activity intensity activities.

| Actual Intensity | Basketball                  |             |             | Running     |             |             | Locomotor course |             |             | Soccer      |             |             |
|------------------|-----------------------------|-------------|-------------|-------------|-------------|-------------|------------------|-------------|-------------|-------------|-------------|-------------|
|                  | 1                           | 2           | 3           | 1           | 2           | 3           | 1                | 2           | 3           | 1           | 2           | 3           |
|                  | <b>ENMO<sub>192+</sub></b>  |             |             |             |             |             |                  |             |             |             |             |             |
| 1. non-MVPA      | <b>30.0</b>                 | 68.3        | 1.7         | <b>21.5</b> | 23.4        | 55.1        | <b>20.7</b>      | 39.1        | 40.2        | <b>45.6</b> | 38.2        | 16.2        |
| 2. MPA           | 17.0                        | <b>78.1</b> | 4.9         | 6.1         | <b>22.1</b> | 71.8        | 13.8             | <b>39.4</b> | 46.8        | 15.7        | <b>35.2</b> | 49.1        |
| 3. VPA           | 7.5                         | 71.6        | <b>21.0</b> | 9.4         | 19.2        | <b>71.4</b> | 7.7              | 28.5        | <b>63.8</b> | 7.2         | 19.2        | <b>73.6</b> |
| 4. MVPA          |                             | <b>96.4</b> |             |             | <b>98.5</b> |             |                  | <b>98.2</b> |             |             | <b>98.8</b> |             |
|                  | <b>GENEA<sub>250+</sub></b> |             |             |             |             |             |                  |             |             |             |             |             |
| 1. non-MVPA      | <b>38.3</b>                 | 58.3        | 3.3         | <b>21.5</b> | 22.4        | 56.1        | <b>29.3</b>      | 34.5        | 36.2        | <b>48.5</b> | 32.4        | 19.1        |
| 2. MPA           | 15.2                        | <b>77.7</b> | 7.1         | 4.6         | <b>20.6</b> | 74.8        | 6.5              | <b>29.0</b> | 64.5        | 9.3         | <b>36.1</b> | 54.6        |
| 3. VPA           | 3.0                         | 63.8        | <b>33.2</b> | 1.1         | 15.0        | <b>83.9</b> | 1.7              | 17.6        | <b>80.7</b> | 0.6         | 17.2        | <b>82.2</b> |
| 4. MVPA          |                             | <b>95.8</b> |             |             | <b>98.5</b> |             |                  | <b>98.1</b> |             |             | <b>98.6</b> |             |
|                  | <b>BFEN<sub>314+</sub></b>  |             |             |             |             |             |                  |             |             |             |             |             |
| 1. non-MVPA      | <b>13.</b>                  | 75.         | 11.         | <b>13.</b>  | 19.         | 67.         | <b>11.5</b>      | 21.8        | 66.7        | <b>39.</b>  | 26.         | 33.         |

|         |          |             |            |          |             |            |     |             |             |          |             |            |
|---------|----------|-------------|------------|----------|-------------|------------|-----|-------------|-------------|----------|-------------|------------|
|         | <b>3</b> | 0           | 7          | <b>1</b> | 6           | 3          |     |             |             | <b>7</b> | 5           | 8          |
| 2. MPA  | 3.1      | <b>71.</b>  | 25.        | 3.8      | <b>3.1</b>  | 93.        | 5.3 | <b>13.8</b> | 80.9        | 8.3      | <b>19.</b>  | 72.        |
|         |          | <b>9</b>    | 0          |          |             | 1          |     |             |             |          | <b>4</b>    | 2          |
| 3. VPA  | 0.2      | 31.         | <b>68.</b> | 0.9      | 2.4         | <b>96.</b> | 0.7 | 5.6         | <b>93.8</b> | 0.3      | 5.7         | <b>94.</b> |
|         |          | 7           | <b>1</b>   |          |             | <b>7</b>   |     |             |             |          |             | <b>1</b>   |
| 4. MVPA |          | <b>99.3</b> |            |          | <b>98.8</b> |            |     | <b>99.0</b> |             |          | <b>99.1</b> |            |

Note Table 3: Values in boldface indicate the percentage of epochs correctly classified. MPA: moderate physical activity; VPA: vigorous physical activity; MVPA: moderate-to-vigorous physical activity; ENMO: cut-points developed using Euclidian norm minus one; GENE: cut-points developed using the GENEActiv post processing software; BFEN: cut-points developed using Bandpass Filtered followed by Euclidian Norm.

**Supplemental Digital Content 3.** Confusion matrices for the raw wrist acceleration cut-points using a  $\geq 3$ -MET MVPA definition.

Table 1. Confusion matrix for sedentary and light physical activity intensity activities.

| Actual Intensity | Lying Down                  |     |   | TV viewing   |     |   | Computer Game |     |   | Handheld e-game |            |   | Writing/ Colouring |     |   | Standing activity |            |   | Getting ready |             |     | Slow walk   |             |     |
|------------------|-----------------------------|-----|---|--------------|-----|---|---------------|-----|---|-----------------|------------|---|--------------------|-----|---|-------------------|------------|---|---------------|-------------|-----|-------------|-------------|-----|
|                  | 1                           | 2   | 3 | 1            | 2   | 3 | 1             | 2   | 3 | 1               | 2          | 3 | 1                  | 2   | 3 | 1                 | 2          | 3 | 1             | 2           | 3   | 1           | 2           | 3   |
|                  | <b>ENMO<sub>192+</sub></b>  |     |   |              |     |   |               |     |   |                 |            |   |                    |     |   |                   |            |   |               |             |     |             |             |     |
| 1. non-MVPA      | <b>100.0</b>                | 0.0 | - | <b>100.0</b> | 0.0 | - | <b>99.9</b>   | 0.1 | - | <b>100.0</b>    | 0.0        | - | <b>99.9</b>        | 0.1 | - | <b>99.1</b>       | 0.9        | - | <b>97.6</b>   | 2.0         | 0.4 | <b>75.1</b> | 24.7        | 0.2 |
| 2. MPA           | -                           | -   | - | -            | -   | - | -             | -   | - | 100.0           | <b>0.0</b> | - | -                  | -   | - | 100.0             | <b>0.0</b> | - | 89.5          | <b>8.6</b>  | 1.9 | 57.7        | <b>41.8</b> | 0.5 |
| 3. VPA           | -                           | -   | - | -            | -   | - | -             | -   | - | -               | -          | - | -                  | -   | - | -                 | -          | - | -             | -           | -   | -           | -           | -   |
| 4. MVPA          |                             | -   |   |              | -   |   |               | -   |   |                 | <b>0.0</b> |   |                    | -   |   |                   | <b>0.0</b> |   |               | <b>10.5</b> |     |             | <b>42.5</b> |     |
|                  | <b>GENEA<sub>250+</sub></b> |     |   |              |     |   |               |     |   |                 |            |   |                    |     |   |                   |            |   |               |             |     |             |             |     |
| 1. non-MVPA      | <b>100.0</b>                | 0.0 | - | <b>100.0</b> | 0.0 | - | <b>100.0</b>  | 0.0 | - | <b>100.0</b>    | 0.0        | - | <b>99.4</b>        | 0.6 | - | <b>98.8</b>       | 1.2        | - | <b>96.9</b>   | 2.6         | 0.4 | <b>66.4</b> | 33.4        | 0.2 |
| 2. MPA           | -                           | -   | - | -            | -   | - | -             | -   | - | 100.0           | <b>0.0</b> | - | -                  | -   | - | 100.0             | <b>0.0</b> | - | 89.5          | <b>8.6</b>  | 1.9 | 46.2        | <b>53.1</b> | 0.6 |
| 3. VPA           | -                           | -   | - | -            | -   | - | -             | -   | - | -               | -          | - | -                  | -   | - | -                 | -          | - | -             | -           | -   | -           | -           | -   |
| 4. MVPA          |                             | -   |   |              | -   |   |               | -   |   |                 | <b>0.0</b> |   |                    | -   |   |                   | <b>0.0</b> |   |               | <b>12.7</b> |     |             | <b>51.7</b> |     |
|                  | <b>BFEN<sub>314+</sub></b>  |     |   |              |     |   |               |     |   |                 |            |   |                    |     |   |                   |            |   |               |             |     |             |             |     |
| 1. non-MVPA      | <b>99.8</b>                 | 0.2 | - | <b>99.9</b>  | 0.1 | - | <b>98.7</b>   | 1.3 | - | <b>99.9</b>     | 0.1        | - | <b>98.4</b>        | 1.6 | - | <b>87.9</b>       | 12.1       | - | <b>33.1</b>   | 66.4        | 0.4 | <b>59.3</b> | 40.3        | 0.4 |
| 2. MPA           | -                           | -   | - | -            | -   | - | -             | -   | - | 100.0           | <b>0.0</b> | - | -                  | -   | - | 100.0             | <b>0.0</b> | - | 16.1          | <b>81.6</b> | 2.2 | 38.7        | <b>60.1</b> | 1.3 |
| 3. VPA           | -                           | -   | - | -            | -   | - | -             | -   | - | -               | -          | - | -                  | -   | - | -                 | -          | - | -             | -           | -   | -           | -           | -   |
| 4. MVPA          |                             | -   |   |              | -   |   |               | -   |   |                 | <b>0.0</b> |   |                    | -   |   |                   | <b>0.0</b> |   |               | <b>83.9</b> |     |             | <b>61.3</b> |     |

Note Table 1: Values in boldface indicate the percentage of epochs correctly classified. MPA: moderate physical activity; VPA: vigorous physical activity; MVPA: moderate-to-vigorous physical activity; ENMO: cut-points developed using Euclidian norm minus one; GENE: cut-points developed using the GENEActiv post processing software; BFEN: cut-points developed using Bandpass Filtered followed by Euclidian Norm.

Table 2. Confusion matrix for moderate physical activity intensity activities.

| Actual Intensity | Dancing                     |             |              | Brisk walk  |             |            | Tidy up     |             |            |
|------------------|-----------------------------|-------------|--------------|-------------|-------------|------------|-------------|-------------|------------|
|                  | 1                           | 2           | 3            | 1           | 2           | 3          | 1           | 2           | 3          |
|                  | <b>ENMO<sub>192+</sub></b>  |             |              |             |             |            |             |             |            |
| 1. non-MVPA      | <b>38.1</b>                 | 55.1        | 6.8          | <b>38.9</b> | 61.1        | 0.0        | <b>89.5</b> | 10.5        | 0.0        |
| 2. MPA           | 17.0                        | <b>61.3</b> | 21.7         | 20.4        | <b>79.2</b> | 0.5        | 82.3        | <b>17.7</b> | 0.0        |
| 3. VPA           | 0.0                         | 50.0        | <b>50.0</b>  | 0.0         | 100.0       | <b>0.0</b> | 64.2        | 35.8        | <b>0.0</b> |
| 4. MVPA          |                             | <b>89.7</b> |              |             | <b>80.7</b> |            |             | <b>17.9</b> |            |
|                  | <b>GENEA<sub>250+</sub></b> |             |              |             |             |            |             |             |            |
| 1. non-MVPA      | <b>35.3</b>                 | 55.8        | 8.9          | <b>30.0</b> | 69.7        | <b>0.0</b> | <b>82.4</b> | 17.6        | 0.0        |
| 2. MPA           | 9.2                         | <b>59.2</b> | 31.6         | 20.3        | <b>78.5</b> | 1.0        | 77.1        | <b>22.9</b> | 0.0        |
| 3. VPA           | 0.0                         | 50.0        | <b>50.0</b>  | 0.0         | 100.0       | <b>0.0</b> | 33.3        | 66.7        | <b>0.0</b> |
| 4. MVPA          |                             | <b>90.7</b> |              |             | <b>77.2</b> |            |             | <b>28.7</b> |            |
|                  | <b>BFEN<sub>314+</sub></b>  |             |              |             |             |            |             |             |            |
| 1. non-MVPA      | <b>12.4</b>                 | 70.1        | 17.5         | <b>21.7</b> | 78.0        | 0.4        | <b>21.6</b> | 78.4        | 0.0        |
| 2. MPA           | 0.3                         | <b>54.0</b> | 45.7         | 14.8        | <b>83.4</b> | 1.8        | 7.2         | <b>92.8</b> | 0.0        |
| 3. VPA           | 0.0                         | 0.0         | <b>100.0</b> | 0.0         | 100.0       | <b>0.0</b> | 0.0         | 100.0       | <b>0.0</b> |
| 4. MVPA          |                             | <b>99.7</b> |              |             | <b>85.2</b> |            |             | <b>92.8</b> |            |

Note Table 2: Values in boldface indicate the percentage of epochs correctly classified. MPA: moderate physical activity; VPA: vigorous physical activity; MVPA: moderate-to-vigorous physical activity; ENMO: cut-points developed using Euclidian norm minus one; GENE: cut-points developed using the GENEActiv post processing software; BFEN: cut-points developed using Bandpass Filtered followed by Euclidian Norm.



Table 3: Confusion matrix for vigorous physical activity intensity activities.

| Actual Intensity | Basketball                  |             |             | Running     |             |             | Locomotor course |             |             | Soccer      |             |             |
|------------------|-----------------------------|-------------|-------------|-------------|-------------|-------------|------------------|-------------|-------------|-------------|-------------|-------------|
|                  | 1                           | 2           | 3           | 1           | 2           | 3           | 1                | 2           | 3           | 1           | 2           | 3           |
|                  | <b>ENMO<sub>192+</sub></b>  |             |             |             |             |             |                  |             |             |             |             |             |
| 1. non-MVPA      | <b>28.3</b>                 | 69.7        | 2.0         | <b>16.7</b> | 18.9        | 64.4        | <b>23.5</b>      | 48.5        | 27.9        | <b>41.6</b> | 36.0        | 22.5        |
| 2. MPA           | 9.2                         | <b>78.6</b> | 12.2        | 13.2        | <b>28.8</b> | 58.0        | 10.9             | <b>39.8</b> | 49.3        | 13.0        | <b>29.2</b> | 57.8        |
| 3. VPA           | 7.4                         | 63.6        | <b>29.1</b> | 3.6         | 6.7         | <b>89.6</b> | 5.6              | 20.5        | <b>73.9</b> | 3.5         | 13.7        | <b>82.8</b> |
| 4. MVPA          |                             | <b>97.0</b> |             |             | <b>98.4</b> |             |                  | <b>98.2</b> |             |             | <b>99.2</b> |             |
|                  | <b>GENEA<sub>250+</sub></b> |             |             |             |             |             |                  |             |             |             |             |             |
| 1. non-MVPA      | <b>32.3</b>                 | 65.7        | 2.0         | <b>16.7</b> | 18.9        | 64.4        | <b>23.5</b>      | 35.3        | 41.2        | <b>43.8</b> | 31.5        | 24.7        |
| 2. MPA           | 7.1                         | <b>72.2</b> | 20.7        | 1.9         | <b>24.3</b> | 73.8        | 3.2              | <b>27.6</b> | 69.2        | 1.5         | <b>26.9</b> | 71.6        |
| 3. VPA           | 0.2                         | 55.9        | <b>43.9</b> | 1.1         | 3.1         | <b>95.8</b> | 1.0              | 10.3        | <b>88.7</b> | 0.4         | 12.3        | <b>87.3</b> |
| 4. MVPA          |                             | <b>96.6</b> |             |             | <b>98.4</b> |             |                  | <b>98.0</b> |             |             | <b>99.0</b> |             |
|                  | <b>BFEN<sub>314+</sub></b>  |             |             |             |             |             |                  |             |             |             |             |             |
| 1. non-MVPA      | <b>8.1</b>                  | 80.8        | 11.1        | <b>9.8</b>  | 15.9        | 74.2        | <b>13.2</b>      | 30.9        | 55.9        | <b>37.1</b> | 23.6        | 39.3        |
| 2. MPA           | 1.2                         | <b>48.9</b> | 49.9        | 1.6         | <b>3.6</b>  | 94.8        | 1.7              | <b>10.0</b> | 88.3        | 1.2         | <b>10.2</b> | 88.6        |
| 3. VPA           | 0.0                         | 17.6        | <b>82.4</b> | 0.9         | 0.7         | <b>98.4</b> | 0.5              | 2.6         | <b>96.9</b> | 0.0         | 3.9         | <b>96.1</b> |
| 4. MVPA          |                             | <b>99.3</b> |             |             | <b>98.7</b> |             |                  | <b>98.4</b> |             |             | <b>99.5</b> |             |

Note Table 3: Values in boldface indicate the percentage of epochs correctly classified. MPA: moderate physical activity; VPA: vigorous physical activity; MVPA: moderate-to-vigorous physical activity; ENMO: cut-points developed using Euclidian norm minus one; GENE: cut-points developed using the GENEActiv post processing software; BFEN: cut-points developed using Bandpass Filtered followed by Euclidian Norm.
